# Supplementary material for: Isolation, Identification and Function of Pichia anomala AR2016 and Its Effects on the Growth and Health of Weaned Pigs
Source: MDPI journal article supplement (doi:10.3390/ani11041179), 2021-04-20
Supplement: s1 [file s1]

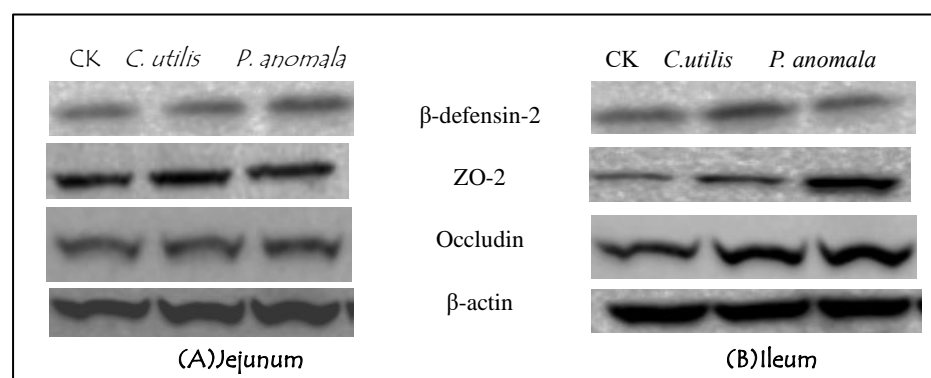

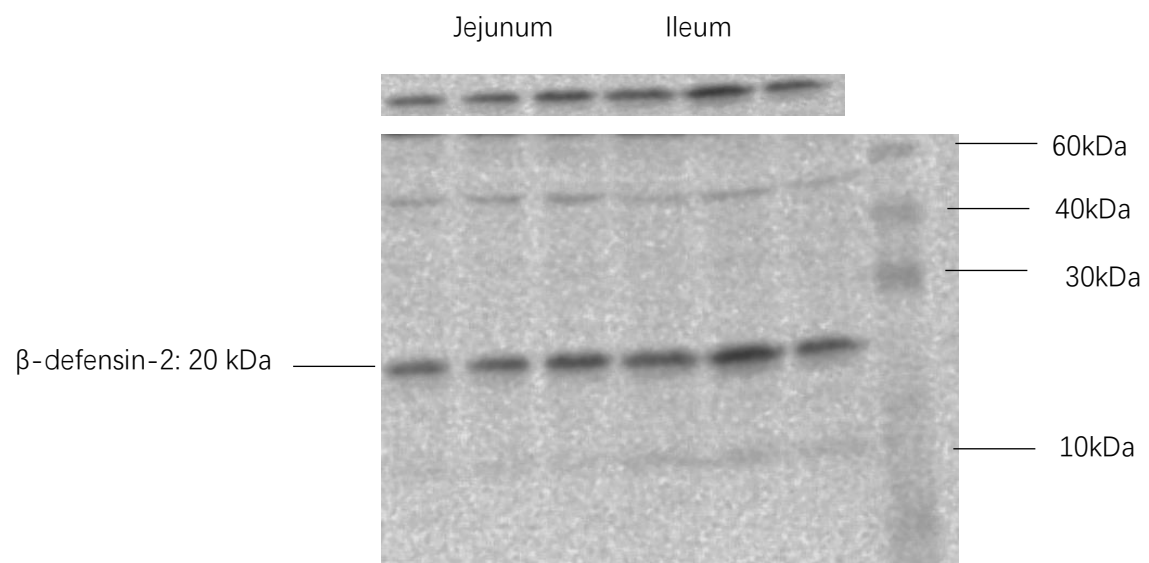

Jejunum  $\beta$ -actin

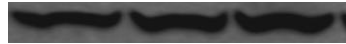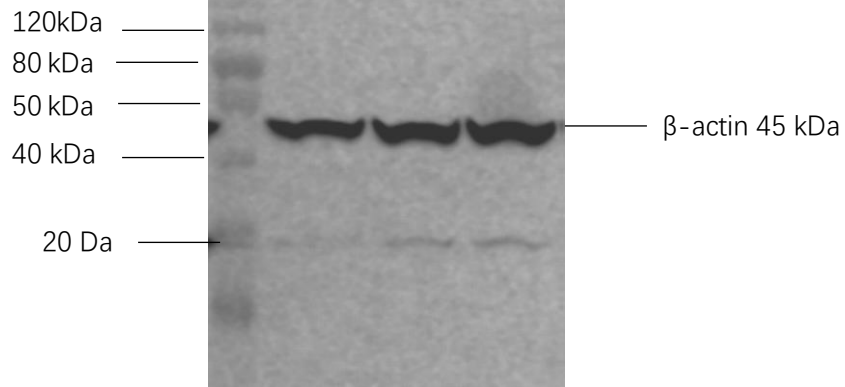

Ileum  $\beta$ -actin

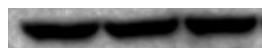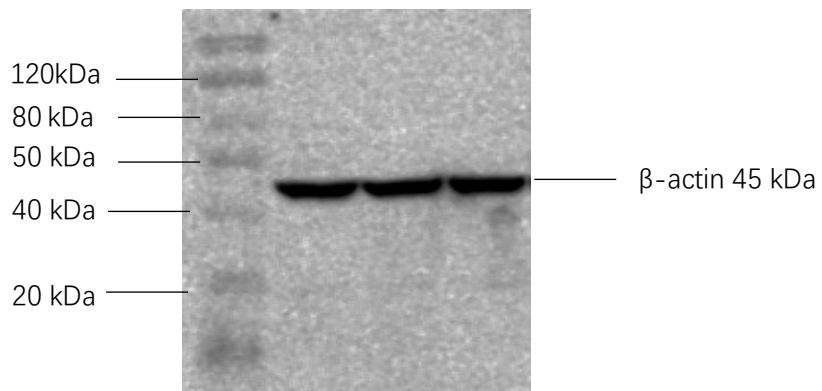

Jejunum Occludin 57 kDa

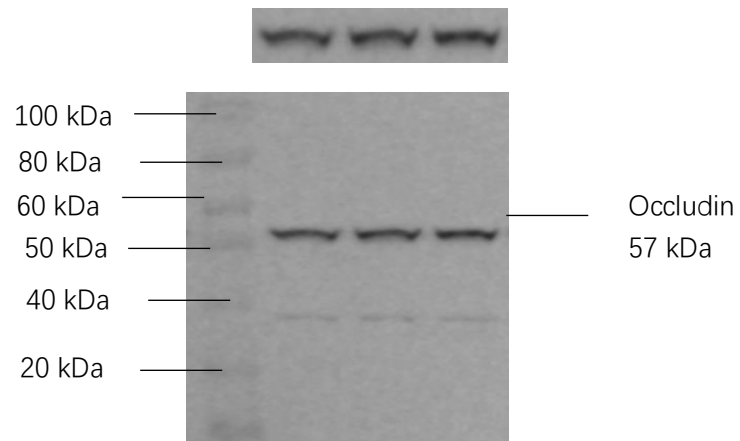

Ileum Occludin 57 kDa

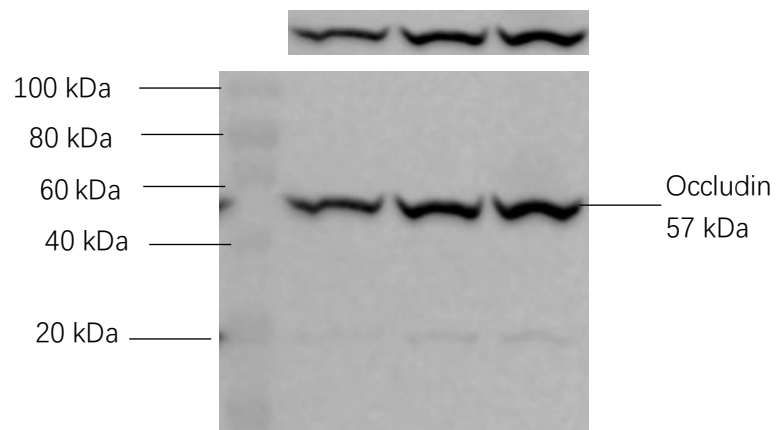

Jejunum ZO-1

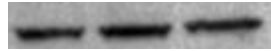

ZO-1  
220 kDa

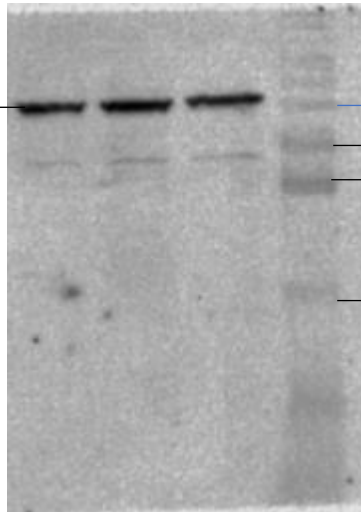

200 kDa  
120 kDa  
80 kDa

50 kDa

Ileum ZO-1

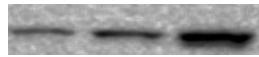

ZO-1  
220 kDa

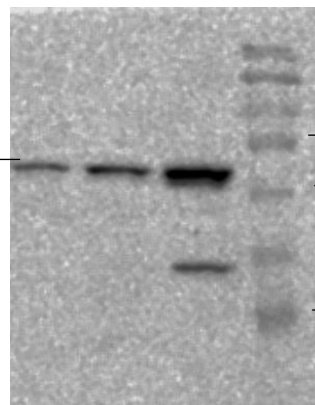

200 kDa  
120 kDa  
80 kDa  
50 kDa
